# Supplementary material for: Alteration of the oral and gut microbiota in patients with Kawasaki disease
Source: PeerJ journal article supplement (doi:10.7717/peerj.15662), 2023-07-10

- Patient\_F
- Patient\_O
- Control\_F
- Control\_O

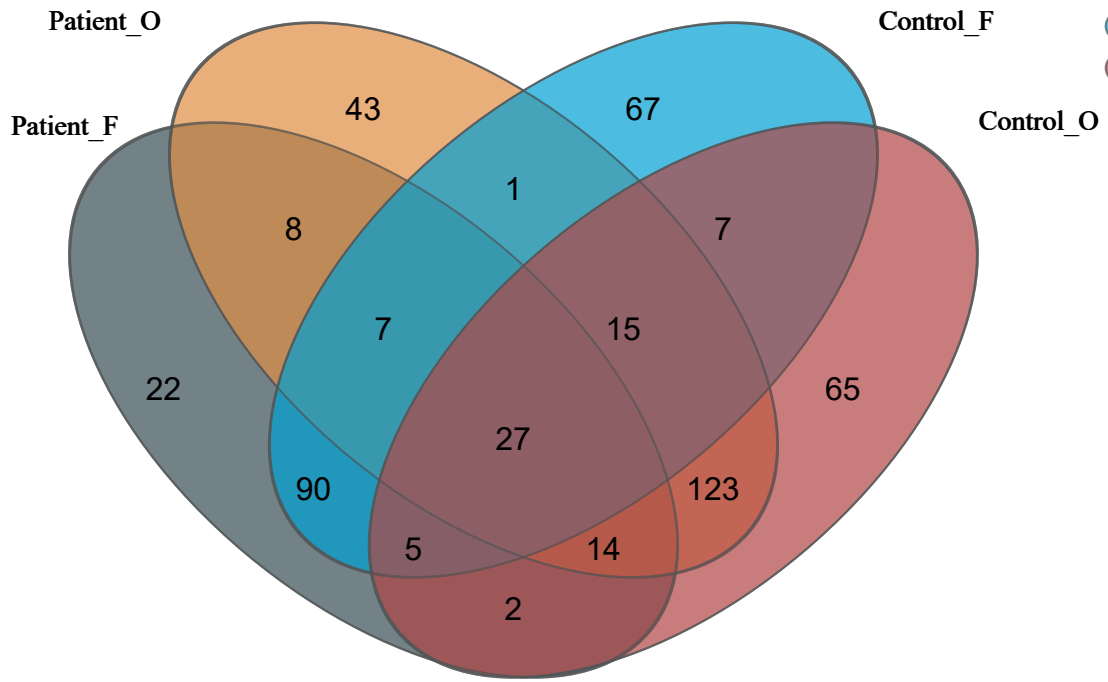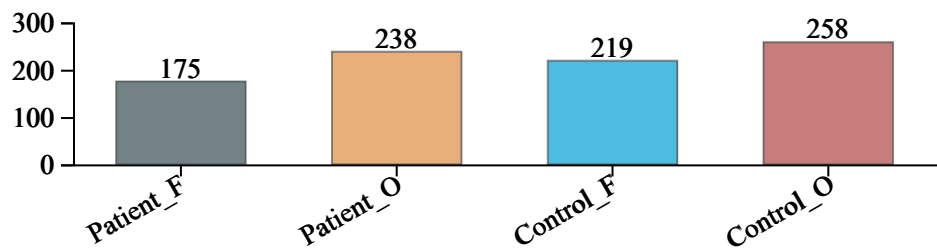

Supplement: Figure_S1.pdf [file Figure_S1.pdf]
