# Supplementary material for: Alteration of the oral and gut microbiota in patients with Kawasaki disease
Source: PeerJ journal article supplement (doi:10.7717/peerj.15662), 2023-07-10

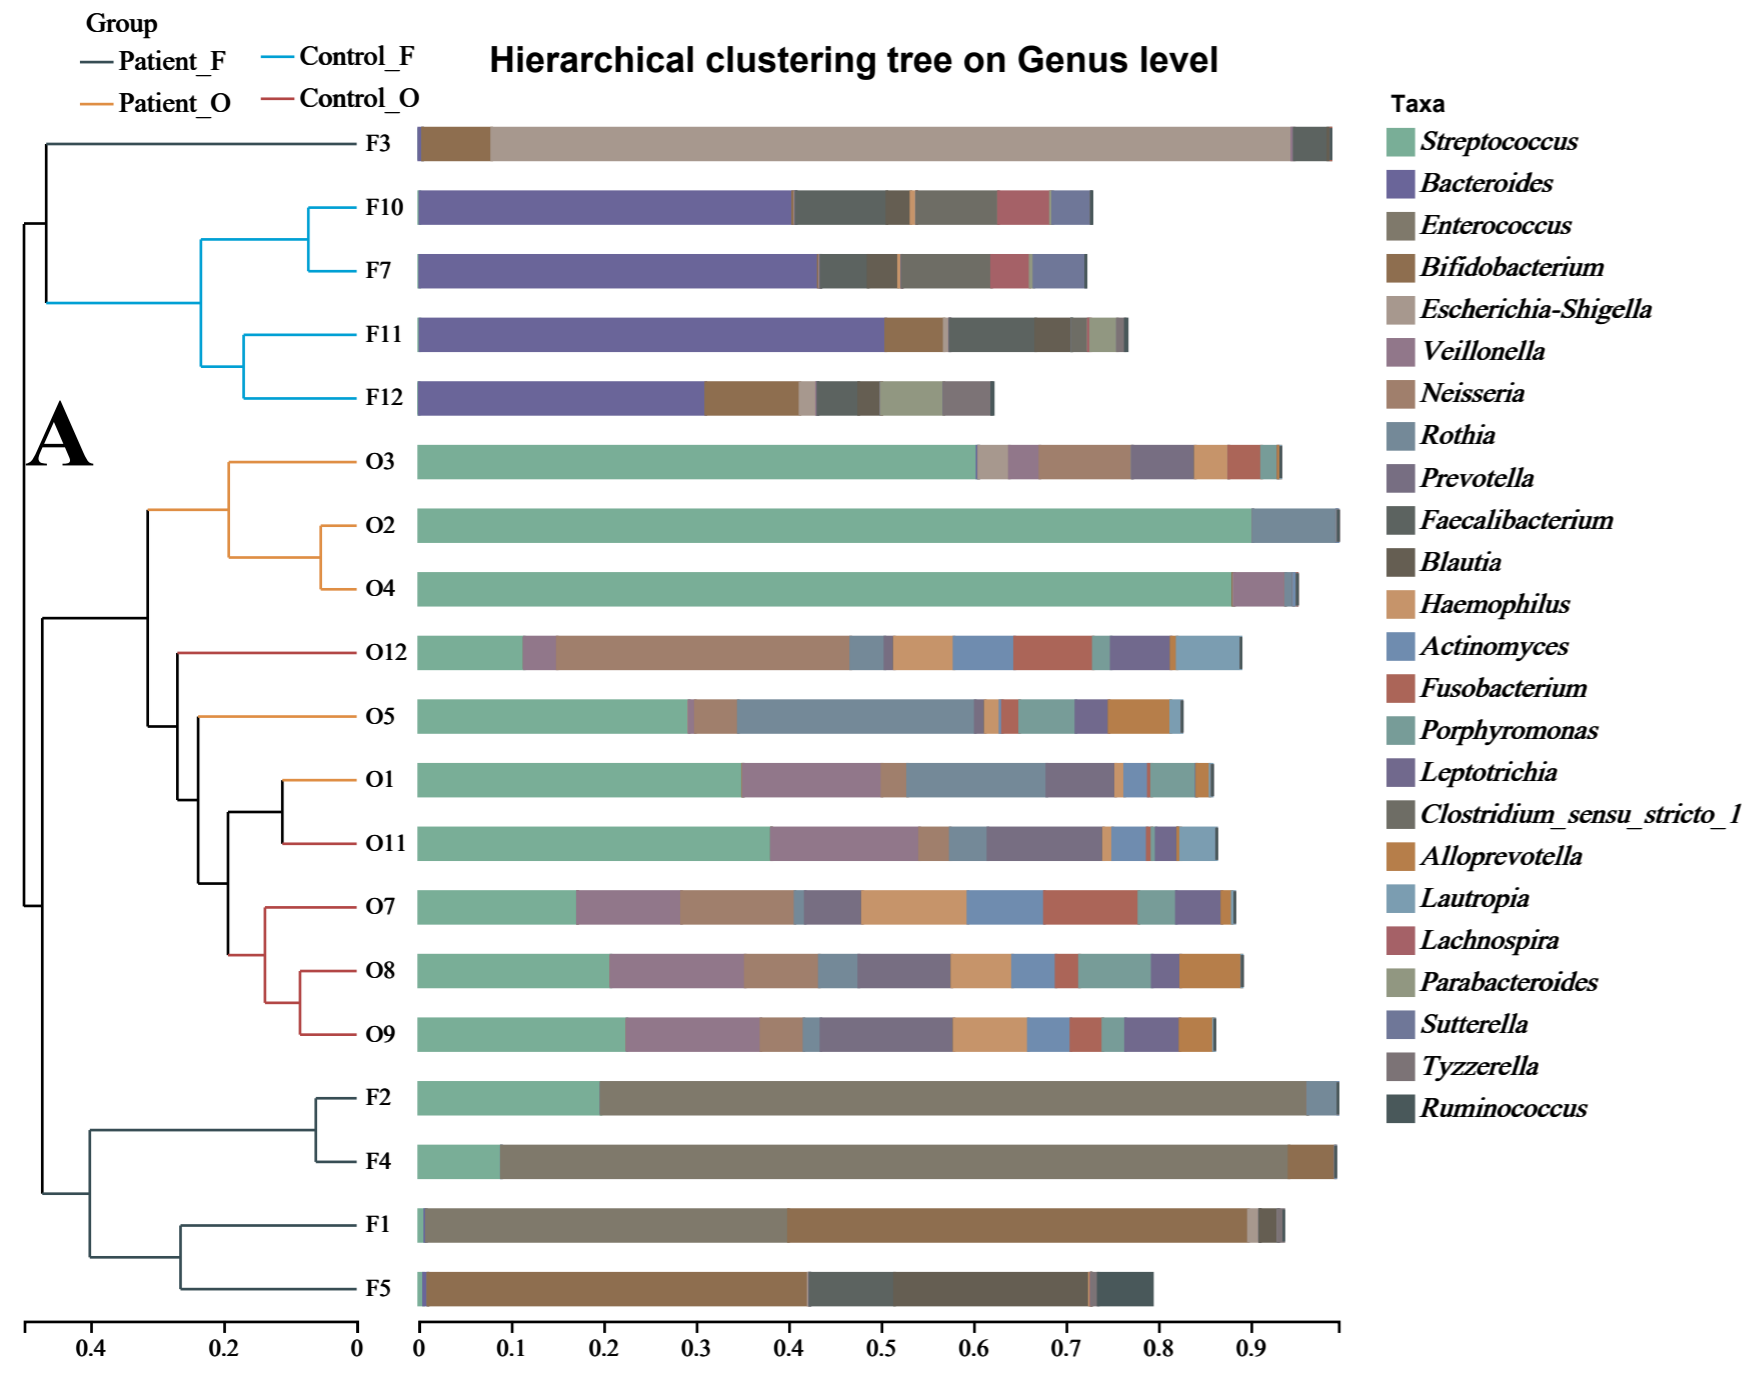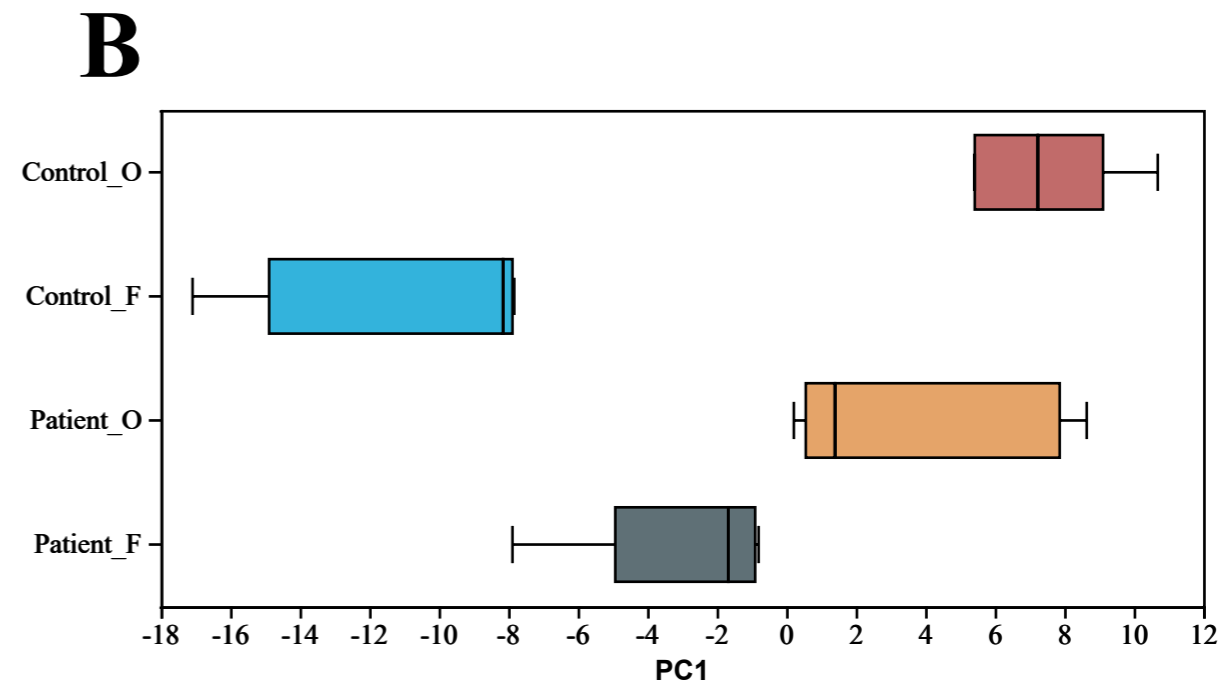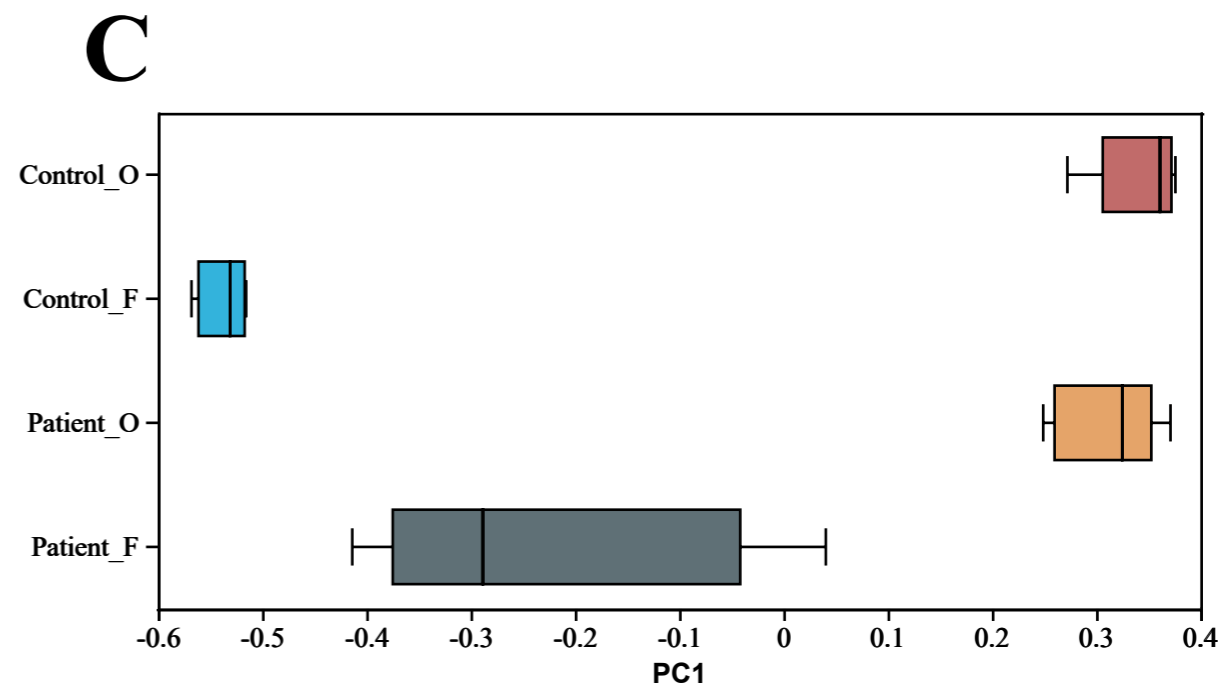

Supplement: Figure_S3.pdf [file Figure_S3.pdf]
