# Supplementary material for: Alteration of the oral and gut microbiota in patients with Kawasaki disease
Source: PeerJ journal article supplement (doi:10.7717/peerj.15662), 2023-07-10

Community analysis pieplot on Genus level :Control\_F

A

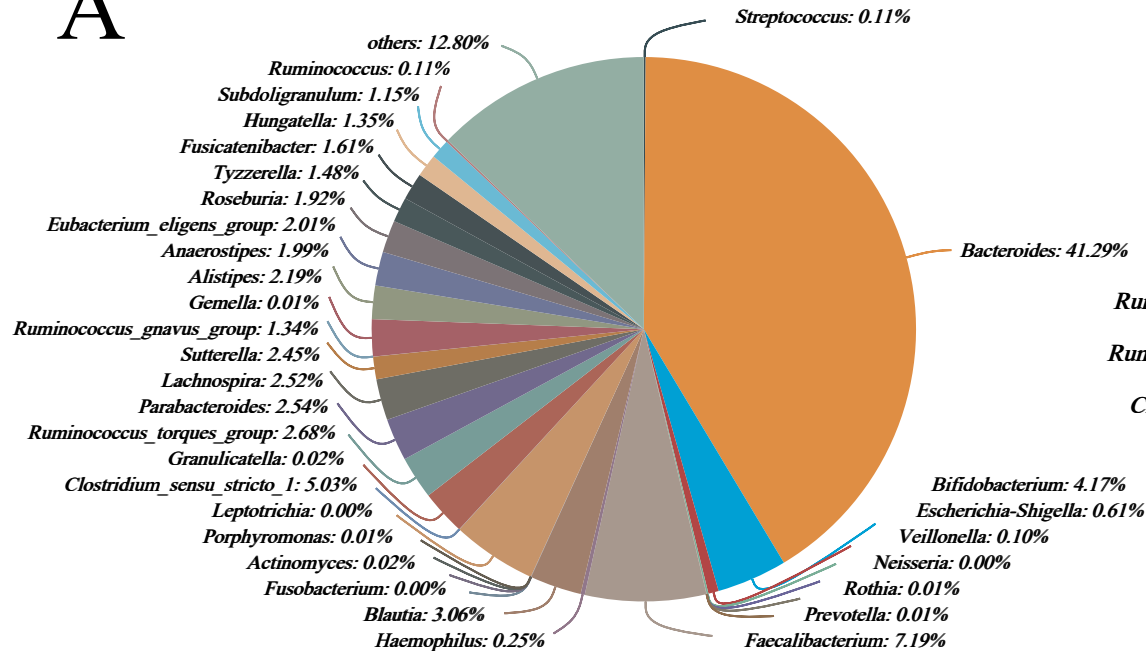

Community analysis pieplot on Genus level :Patient\_F

B

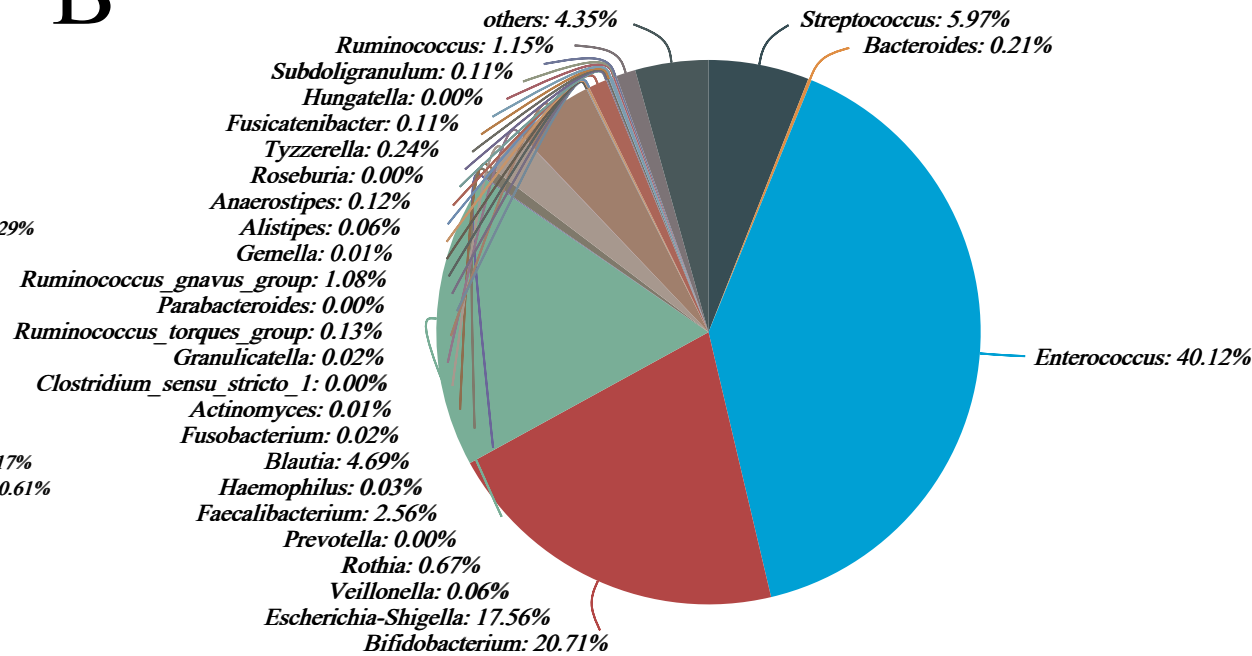

Community analysis pieplot on Genus level :Control\_O

C

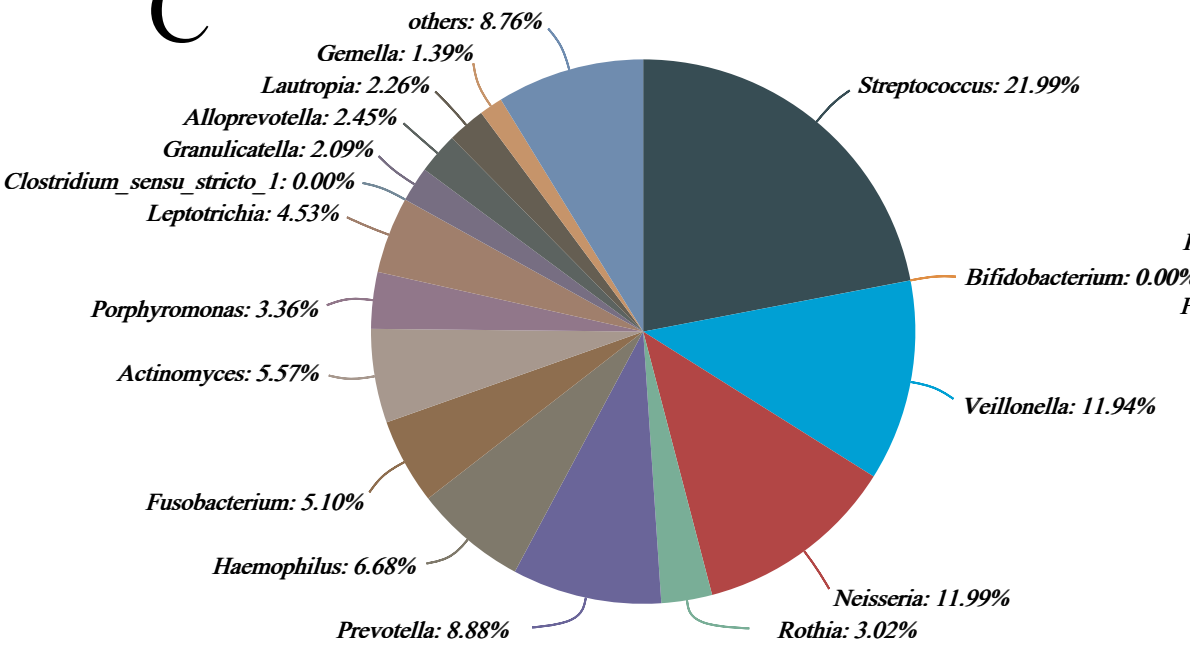

Community analysis pieplot on Genus level :Patient\_O

D

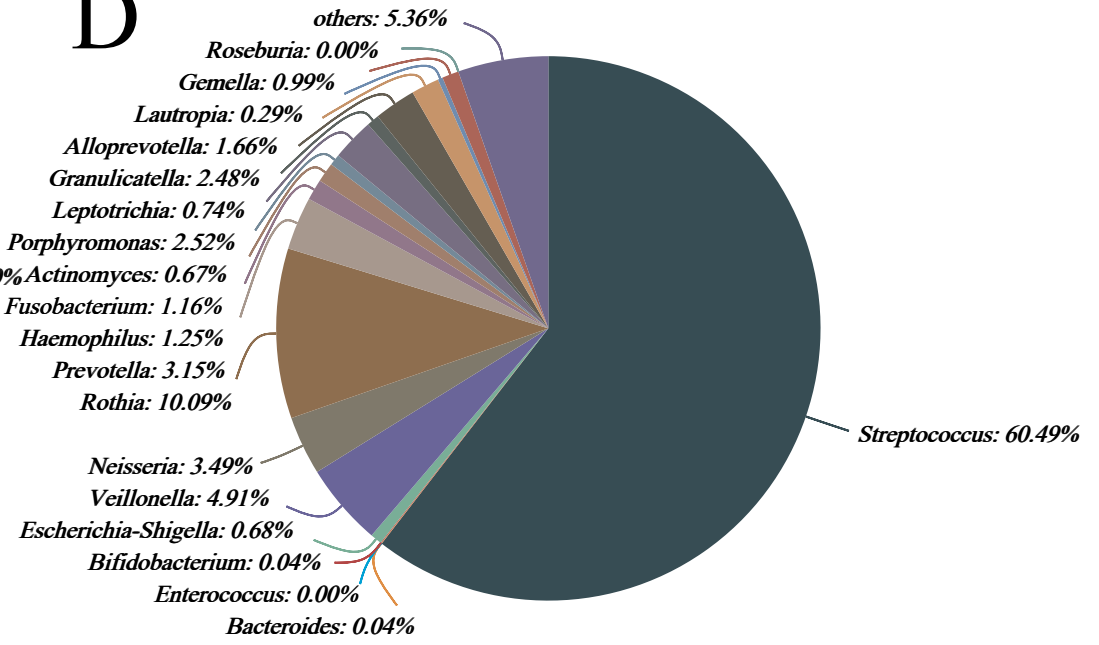

Supplement: Figure_S5.pdf [file Figure_S5.pdf]
